# Supplementary material
Source: Springer Nature journal article supplement (https://www.springermedizin.de/resource/supplementary/12957_2013_1608_MOESM1_ESM.pdf/9563048)

**A-1**

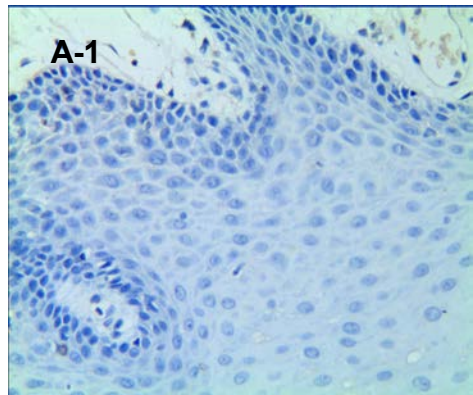

**A-2**

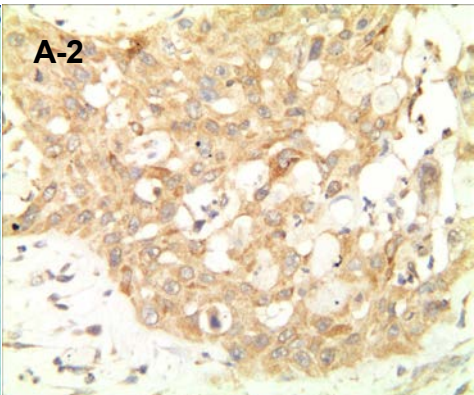

**A-3**

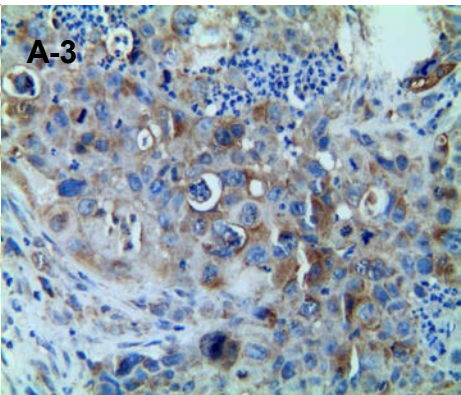

**B-1**

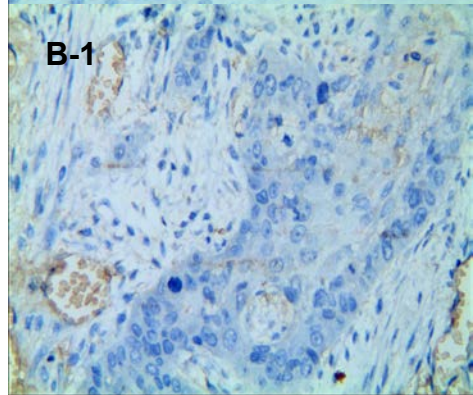

**B-2**

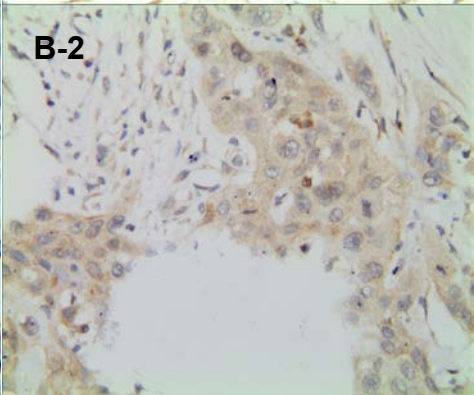

**B-3**

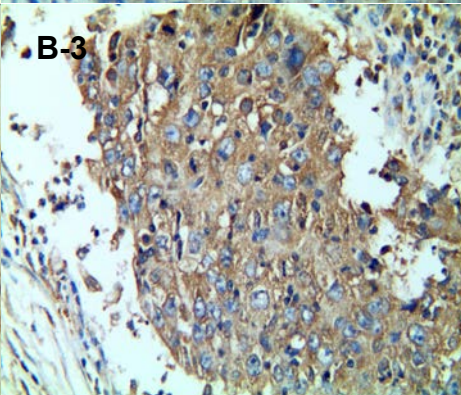

Supplement: MOESM1 [file 9563048]
